# Supplementary material
Source: PubMed Central journal article supplement (PMC5776681)
Supplement: NIHMS919937-supplement-Tables.pdf [file NIHMS919937-supplement-Tables.pdf]

# **Hepatocellular carcinoma decreases the chance of successful hepatitis C virus therapy with direct-acting antivirals**

Stacey B. Prenner, Lisa B. VanWagner, Steven L. Flamm, Riad Salem, Robert J. Lewandowski, Laura Kulik

## **Table of contents**

|                      |          |
|----------------------|----------|
| <b>Table S1.....</b> | <b>2</b> |
| <b>Table S2.....</b> | <b>4</b> |
| <b>Table S3.....</b> | <b>5</b> |

**Table S1. Characteristics of HCV+ Patients with Cirrhosis at time of DAA Initiation**

| Characteristics                    | Non-HCC<br>(n=220) | HCC Active<br>Tumor<br>(n=59) | HCC nonactive<br>tumor<br>(n=18) | P Value*            |
|------------------------------------|--------------------|-------------------------------|----------------------------------|---------------------|
| Age, mean, years                   | 60 ± 8.8           | 64 ± 7.1                      | 64 ± 7.7                         | 0.01                |
| Male, no. (%)                      | 139 (63)           | 48 (81)                       | 10 (56)                          | 0.02                |
| Race/Ethnicity, no. (%)            |                    |                               |                                  | 0.06                |
| Caucasian                          | 133 (64)           | 42 (71)                       | 10 (56)                          |                     |
| African American                   | 33 (16)            | 8 (14)                        | 4 (22)                           |                     |
| Hispanic                           | 32 (15)            | 8 (14)                        | 1 (6)                            |                     |
| Other                              | 22 (10)            | 1 (1)                         | 3 (16)                           |                     |
| BMI (kg/m <sup>2</sup> ), mean     | 29 ± 5.2           | 28 ± 5                        | 27 ± 3.4                         | 0.09                |
| Former Alcohol Use, no. (%)        | 52 (24)            | 22 (37)                       | 1 (6)                            | 0.01                |
| Calculated MELD                    | 11 ± 4.2           | 10 ± 2.9                      | 10 ± 4.2                         | 0.16                |
| Child Turcotte-Pugh Class, no. (%) |                    |                               |                                  | P=0.76 <sup>†</sup> |
| A                                  | 143 (65)           | 39 (67)                       | 13 (72)                          |                     |
| B                                  | 75 (34)            | 18 (31)                       | 5 (28)                           |                     |
| C                                  | 2 (0.7)            | 1 (0.3)                       | 0 (0)                            |                     |
| Ascites, no. (%)                   | 69 (31)            | 15 (25)                       | 3 (17)                           | 0.32                |
| Hepatic Encephalopathy, no. (%)    | 52 (24)            | 9 (15)                        | 3 (17)                           | 0.33                |
| AFP (ng/mL)                        | 23 ± 46            | 74 ± 158.6                    | 29 ± 29.7                        | 0.0002              |
| Creatinine (mg/dL)                 | 1.05 ± 1.43        | 0.88 ± 0.25                   | 0.87 ± 0.26                      | 0.58                |
| Total Bilirubin (mg/dL)            | 1.52 ± 1.17        | 1.25 ± 0.68                   | 1.08 ± 0.55                      | 0.78                |
| Albumin (g/dL)                     | 3.57 ± 0.65        | 3.50 ± 0.57                   | 3.53 ± 0.63                      | 0.73                |
| INR                                | 1.23 ± 0.31        | 1.21 ± 0.22                   | 1.33 ± 0.68                      | 0.43                |
| AST (units/L)                      | 81 ± 49            | 93 ± 83.8                     | 87 ± 51.7                        | 0.33                |
| ALT (units/L)                      | 72 ± 53.4          | 86 ± 110.8                    | 78 ± 55.4                        | 0.38                |
| Platelets (μL)                     | 124 ± 90.4         | 120 ± 77.6                    | 119 ± 55.5                       | 0.92                |
| Sodium (mmol/L)                    | 137 ± 2.87         | 138 ± 3.09                    | 137 ± 2.85                       | 0.13                |
| HBsAg present, no. (%)             | 3 (1)              | 1 (2)                         | 0 (0)                            | 0.85                |
| HBcIgG present, no. (%)            | 45 (23)            | 21 (39)                       | 7 (44)                           | 0.02                |
| Log HCV viral load                 | 13.3 ± 2.1         | 13.0 ± 2.4                    | 13.2 ± 1.3                       | 0.65                |

|                                |          |         |         |          |
|--------------------------------|----------|---------|---------|----------|
| Treatment Experienced, no. (%) | 133 (60) | 27 (46) | 14 (78) | 0.03     |
| HCV Genotype                   |          |         |         | 0.15     |
| 1                              | 189 (86) | 51 (86) | 14 (78) |          |
| 2                              | 12 (5)   | 0 (0)   | 2 (11)  |          |
| 3                              | 16 (7)   | 8 (14)  | 2 (11)  |          |
| Other                          | 3 (1)    | 0 (0)   | 0 (0)   |          |
| Treatment Regimen (%)          |          |         |         | n/a      |
| SOF/SIM 12 weeks               | 113 (51) | 19 (32) | 10 (56) |          |
| SOF/LDV 12 weeks               | 26 (12)  | 18 (31) | 1 (6)   |          |
| SOF/LDV 24 weeks               | 41 (19)  | 6 (10)  | 3 (17)  |          |
| SOF/RBV                        | 29 (13)  | 7 (12)  | 0 (0)   |          |
| SOF/LDV/RBV                    | 3 (1)    | 6 (10)  | 3 (17)  |          |
| SOF/SIM 24 weeks               | 3 (1)    | 2 (4)   | 0 (0)   |          |
| 3D/RBV                         | 3 (1)    | 0 (0)   | 0 (0)   |          |
| 3D                             | 1 (0.5)  | 0 (0)   | 0 (0)   |          |
| Treatment Classification* (%)  |          |         |         | 0.004    |
| Inadequate                     | 144 (65) | 26 (44) | 14 (78) |          |
| Adequate                       | 76 (35)  | 33 (56) | 4 (22)  |          |
| Treatment Failure (%)          | 32 (15)  | 27 (46) | 0 (0)   | P<0.0001 |

\*Treatment classified as inadequate or adequate based on current HCV treatment standards. Inadequate treatment was defined as simeprevir/sofosbuvir 12 weeks or sofosbuvir/ledipasvir 12 weeks in treatment-experienced patients or sofosbuvir/ribavirin regimens.

\*\*Not enough power to generate a p value

† Comparisons between Child's A versus Child's B or C

**Table S2. Multivariable Predictors of DAA Treatment Failure Among HCV+ Patients with Cirrhosis**

| <b>Covariate</b>                | <b>Odds Ratio</b> | <b>95% Confidence Interval</b> | <b>P Value</b> |
|---------------------------------|-------------------|--------------------------------|----------------|
| Age (per year)                  | 0.99              | 0.95-1.03                      | 0.62           |
| Male Gender                     | 1.28              | 0.59-2.74                      | 0.53           |
| White Race                      | 0.50              | 0.17-1.47                      | 0.21           |
| Hispanic Ethnicity              | 2.16              | 0.59-7.82                      | 0.24           |
| Childs class (A versus B and C) | 1.26              | 0.62-2.59                      | 0.52           |
| Platelets (per 1 $\mu$ L)       | 1.00              | 0.99-1.00                      | 0.16           |
| Genotype 3 (versus 1 or 4)      | 1.65              | 0.60-4.57                      | 0.33           |
| HbClgG Present                  | 0.59              | 0.26-1.33                      | 0.20           |
| Inadequate Regimen              | 2.90              | 1.27-6.63                      | 0.01           |
| Active tumor                    | 5.80              | 2.55-13.20                     | <0.001         |

N of final multivariate model = X. 27 patients are excluded as no patient with inactive tumor (n=18) or genotype 2 (n=9) failed treatment

Abbreviations: HbClgG, Hepatitis B Core IgG;

**Table S3. Multivariate Predictors of DAA Treatment Failure in the Entire Population, Excluding Genotype 3**

| <b>Covariate</b>                | <b>Odds Ratio</b> | <b>95% Confidence Interval</b> | <b>P Value</b> |
|---------------------------------|-------------------|--------------------------------|----------------|
| Age (per year)                  | 0.99              | 0.95-1.03                      | 0.75           |
| Male Gender                     | 1.38              | 0.63-3.05                      | 0.42           |
| White Race                      | 0.78              | 0.30-2.03                      | 0.61           |
| Hispanic Ethnicity              | 1.40              | 0.44-4.41                      | 0.57           |
| Childs class (A versus B and C) | 1.46              | 0.71-3.00                      | 0.31           |
| Platelets (per 1 $\mu$ L)       | 0.99              | 0.99-1.00                      | 0.07           |
| Genotype 4 (versus 1)           | 1.64              | 0.15-17.96                     | 0.68           |
| HbCIgG Present                  | 0.64              | 0.30-1.35                      | 0.24           |
| Inadequate Regimen*             | 2.44              | 1.10-5.37                      | 0.03           |
| Active Tumor                    | 7.38              | 3.26-16.72                     | <0.001         |

Abbreviations: HbCIgG, Hepatitis B Core IgG

Patients with Genotype 2 are excluded from the model as there were no Genotype 2 treatment failures.

\*Treatment classified as inadequate or adequate based on current HCV treatment standards. Inadequate treatment was defined as simeprevir/sofosbuvir 12 weeks or sofosbuvir/ledipasvir 12 weeks in treatment-experienced patients or sofosbuvir/ribavirin regimens.
